# Supplementary material for: Correlations Between the Incidence of National Notifiable Infectious Diseases and Public Open Data, Including Meteorological Factors and Medical Facility Resources
Source: PubMed Central journal article supplement — J Prev Med Public Health. 2015 Jul 27;48(4):203–15. doi: 10.3961/jpmph.14.057 (PMC4542299; doi:10.3961/jpmph.14.057), 2015-07-27
Supplement: jpmph-48-4-203-supple1.pdf [file jpmph-48-4-203-supple1.pdf]

**Supplemental Table 1.** The number of domestic and international public datasets

| Ranking | Country            | Site           | No. of datasets | Format of data                            |
|---------|--------------------|----------------|-----------------|-------------------------------------------|
| 1       | Canada             | data.gc.ca     | 209 250         | SHP, XML, HTML, CSV, PDF, GEOTIF          |
| 2       | USA                | data.gov       | 157 586         | CSV, HTML, XML, JSON, SOAP, XLS           |
| 3       | United Kingdom     | data.gov.uk    | 19 628          | XML, JSON, KML, KMZ, HTML, CSV, VMS       |
| 4       | Japan              | data.go.jp     | 12 347          | HTML, PDF, XLS, ZIP, CSV, DOC             |
| 5       | Korea, Republic of | data.go.kr     | 11 433          | XLS, HWP, REST, HTML, PDF, XML, JSON      |
| 6       | Singapore          | data.gov.sg    | 8275            | CSV, TXT, URL, XLS, XML                   |
| 7       | Australia          | data.gov.au    | 3746            | ZIP, CSV, PLAIN, SHP, XLS, PDF, WMS, JSON |
| 8       | Spain              | datos.gob.es   | 2898            | PC-AXIS, CSV, XLS, HTML, JSON, SPARQL     |
| 9       | New Zealand        | data.govt.nz   | 2564            | XLS, PDF, HTML, API, KML/SHP, XML         |
| 10      | Germany            | portalu.de     | 2468            | XML, PDF, DOC, FLA, ZIP                   |
| 11      | Finland            | suomi.fi       | 266             | XML, JSON                                 |
| 12      | Saudi Arabia       | saudi.gov.sa   | 247             | PDF, XLS, XLSX                            |
| 13      | Greece             | geodata.gov.gr | 194             | XLS, ODS, SHP, GML, KML ODS, MAP          |
| 14      | Belgium            | data.gov.be    | 105             | HTML, XHTML, XLS, XML, CSV                |
| 15      | Norway             | data.norge.no  | 35              | HTML, CSV, PDF, JSON, JSONP, YAML         |

Obtained from each country's open data portal site [cited 2014 Oct 13].
