# Supplementary material for: Correlations Between the Incidence of National Notifiable Infectious Diseases and Public Open Data, Including Meteorological Factors and Medical Facility Resources
Source: PubMed Central journal article supplement — J Prev Med Public Health. 2015 Jul 27;48(4):203–15. doi: 10.3961/jpmph.14.057 (PMC4542299; doi:10.3961/jpmph.14.057), 2015-07-27
Supplement: jpmph-48-4-203-supple2.pdf [file jpmph-48-4-203-supple2.pdf]

**Supplemental Table 2.** Descriptive statistics of climactic and air pollution-related variables

| Variables                              | Monthly average |       |       |       |       |       |       |       |       |       |       |       |
|----------------------------------------|-----------------|-------|-------|-------|-------|-------|-------|-------|-------|-------|-------|-------|
|                                        | Jan             | Feb   | Mar   | Apr   | May   | Jun   | Jul   | Aug   | Sep   | Oct   | Nov   | Dec   |
| Average temperature (°C)               | -3.4            | -1.2  | 5.1   | 10    | 18.2  | 24.4  | 25.5  | 27.7  | 21.8  | 15.8  | 6.2   | -0.2  |
| Average high temperature (°C)          | 0.3             | 2.8   | 10.8  | 15    | 23.6  | 29.2  | 28.3  | 31.1  | 25.9  | 21.2  | 10.7  | 3.5   |
| Average low temperature (°C)           | -6.6            | -4.9  | 0.7   | 5.7   | 13.7  | 20.5  | 23.4  | 24.8  | 18    | 10.9  | 2.1   | -3.5  |
| Rainfall (mm)                          | 22.1            | 74.1  | 27.3  | 71.7  | 132   | 28.3  | 676.2 | 148.6 | 138.5 | 13.5  | 46.8  | 24.7  |
| Relative humidity (%)                  | 57              | 54    | 49    | 54    | 58    | 60    | 79    | 69    | 63    | 58    | 58    | 60    |
| PM <sub>2.5</sub> (µg/m <sup>3</sup> ) | 63.88           | 44.52 | 55.36 | 52.24 | 55.33 | 40.12 | 34.16 | 35    | 28.08 | 29.16 | 42.56 | 55.04 |
| SO <sub>2</sub> (ppm)                  | 0.008           | 0.006 | 0.006 | 0.006 | 0.006 | 0.005 | 0.004 | 0.004 | 0.004 | 0.004 | 0.005 | 0.007 |
| O <sub>3</sub> (ppm)                   | 0.012           | 0.018 | 0.023 | 0.031 | 0.034 | 0.033 | 0.024 | 0.027 | 0.023 | 0.017 | 0.012 | 0.009 |
| NO <sub>2</sub> (ppm)                  | 0.045           | 0.038 | 0.037 | 0.034 | 0.035 | 0.03  | 0.022 | 0.024 | 0.026 | 0.03  | 0.036 | 0.043 |
| CO (ppm)                               | 0.9             | 0.6   | 0.5   | 0.5   | 0.5   | 0.4   | 0.4   | 0.4   | 0.4   | 0.4   | 0.6   | 0.8   |

Data were obtained from the Korea Meteorological Administration (<http://sts.kma.go.kr>).

PM<sub>2.5</sub>, fine particulate matter; SO<sub>2</sub>, sulfur dioxide; O<sub>3</sub>, ozone; NO<sub>2</sub>, nitrogen dioxide; CO, carbon monoxide; ppm, parts per million.
