# Supplementary material for: Correlations Between the Incidence of National Notifiable Infectious Diseases and Public Open Data, Including Meteorological Factors and Medical Facility Resources
Source: PubMed Central journal article supplement — J Prev Med Public Health. 2015 Jul 27;48(4):203–15. doi: 10.3961/jpmph.14.057 (PMC4542299; doi:10.3961/jpmph.14.057), 2015-07-27
Supplement: jpmph-48-4-203-supple3.pdf [file jpmph-48-4-203-supple3.pdf]

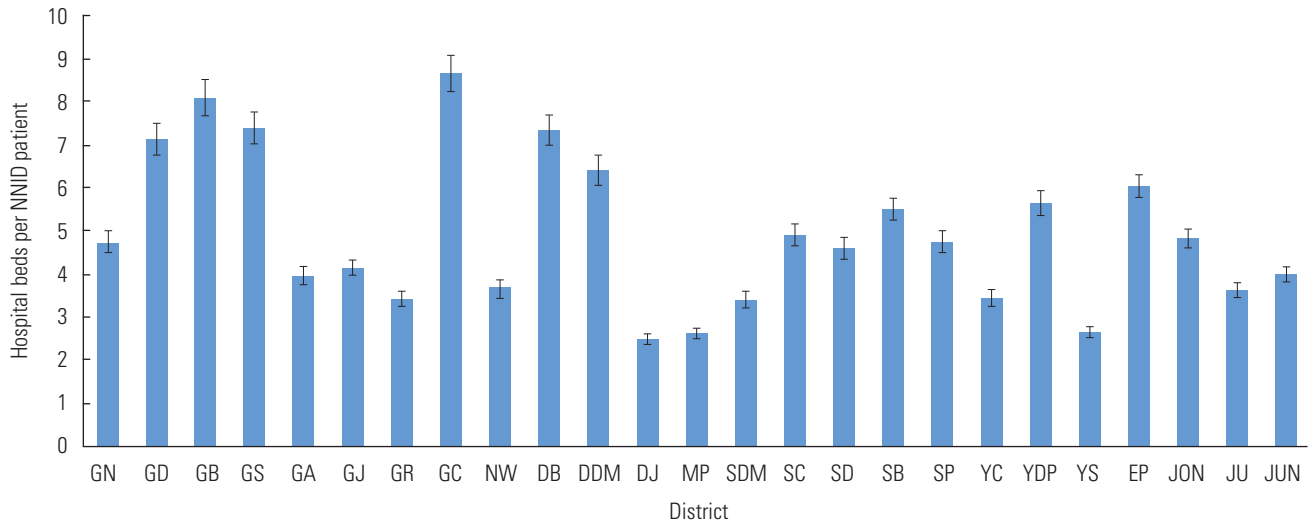

**Supplemental Figure 1.** The number of hospital beds per NNID patient by district in Seoul. Data were extracted from the Public Data Portal ([www.data.go.kr](http://www.data.go.kr)) and Seoul City Open Data Square (<http://data.seoul.go.kr>). GN, Gangnam-gu; GD, Gangdong-gu; GB, Gangbuk-gu; GS, Gangseo-gu; GA, Gwanak-gu; GJ, Gwangjin-gu; GR, Guro-gu; GC, Geumcheon-gu; NW, Nowon-gu; DB, Dobong-gu; DDM, Dongdaemun-gu; DJ, Dongjak-gu; MP, Mapo-gu; SDM, Seodaemun-gu; SC, Seocho-gu; SD, Seongdong-gu; SB, Seongbuk-gu; SP, Songpa-gu; YC, Yangcheon-gu; YDP, Yeongdeungpo-gu; YS: Youngsan-gu; EP, Eunpyeong-gu; JoN, Jongno-gu; Ju, Jung-gu; JuN, Jungnang-gu; NNID, nationally notifiable infectious disease.
